# Supplementary material for: Genetic Basis for Developmental Homeostasis of Germline Stem Cell Niche Number: A Network of Tramtrack-Group Nuclear BTB Factors
Source: PubMed Central journal article supplement (PMC3503823; doi:10.1371/journal.pone.0049958), 2012-11-21
Supplement: pone.0049958.s003.pdf [file pone.0049958.s003.pdf]

**Table S1 . Statistical significance (p) of comparisons between the mean number of ovarioles in heterozygous combinations of *psq*, *Trl* and *batman* alleles and that of wild type control flies.**

For experimental series corresponding to genotypes shown in Figure 1, p-value (p) was calculated using Student's t-test between samples of appropriate genotypes (line/column in S1A-S1D). ΔON (in %, S1A', B', D') was calculated relative to Canton-S. p-values below 5% appear in red, p-values above 5% appear in green.

**Table S1A : p-values (p)**

|                                               | Canton-S | <i>psq</i> <sup>0115/+</sup> | <i>psq</i> <sup>Δ18/+</sup> |
|-----------------------------------------------|----------|------------------------------|-----------------------------|
| <i>psq</i> <sup>0115/+</sup>                  | 1,1E-09  | -                            | -                           |
| <i>psq</i> <sup>Δ18/+</sup>                   | 7,1E-03  | -                            | -                           |
| <i>psq</i> <sup>0115/psq</sup> <sup>Δ18</sup> | 1,6E-12  | 5,4E-02                      | 4,0E-07                     |

**Table S1A' : ΔON (%)**

|                                               | Canton-S |
|-----------------------------------------------|----------|
| <i>psq</i> <sup>Δ18/+</sup>                   | 7.3      |
| <i>psq</i> <sup>0115/+</sup>                  | 19.0     |
| <i>psq</i> <sup>0115/psq</sup> <sup>Δ18</sup> | 24.1     |

**Table S1B : p-values (p)**

|                                                                      | <i>batman</i> <sup>(2)K02512/+</sup> | <i>batman</i> <sup>(2)K07907/+</sup> | <i>batman</i> <sup>(2)K02512 /<br/>batman</sup> <sup>(2)K07907</sup> | <i>p10 batman</i> <sup>(2)K02512 /<br/>+</sup> | <i>p10 batman</i> <sup>(2)K02512 /<br/>/batman</sup> <sup>(2)K07907</sup> |
|----------------------------------------------------------------------|--------------------------------------|--------------------------------------|----------------------------------------------------------------------|------------------------------------------------|---------------------------------------------------------------------------|
| Canton-S                                                             | 2.2E-10                              | 1.1E-05                              | 2.8E-12                                                              | 8.2E-03                                        | 3.7E-10                                                                   |
| <i>batman</i> <sup>(2)K02512/+</sup>                                 | -                                    | -                                    | 9.9E-04                                                              | 6.8E-08                                        | 1.7E-01                                                                   |
| <i>batman</i> <sup>(2)K07907/+</sup>                                 | -                                    | -                                    | 3.8E-05                                                              | -                                              | 1.1E-02                                                                   |
| <i>batman</i> <sup>(2)K02512 /<br/>batman</sup> <sup>(2)K07907</sup> | 9.9E-04                              | 3.8E-05                              | -                                                                    | -                                              | 5.8E-02                                                                   |

**Table S1B' : ΔON (%)**

|                                                                          | Canton-S |
|--------------------------------------------------------------------------|----------|
| <i>batman</i> <sup>(2)K02512/+</sup>                                     | 19.0     |
| <i>batman</i> <sup>(2)K07907/+</sup>                                     | 14.1     |
| <i>batman</i> <sup>(2)K02512 /<br/>batman</sup> <sup>(2)K07907</sup>     | 30.7     |
| <i>p10 batman</i> <sup>(2)K02512 /<br/>+</sup>                           | 5.9      |
| <i>p10 batman</i> <sup>(2)K02512 /<br/>batman</sup> <sup>(2)K07907</sup> | 23.4     |

**Table S1C : p-values (p)**

|                                                                | <i>psq</i> <sup>0115/+</sup> | <i>batman</i> <sup>(2)K02512/+</sup> | <i>Trl</i> <sup>81/+</sup> |
|----------------------------------------------------------------|------------------------------|--------------------------------------|----------------------------|
| <i>batman</i> <sup>(2)K02512 /<br/>psq</sup> <sup>0115</sup>   | 2,0E-10                      | 1,1E-11                              | -                          |
| <i>batman</i> <sup>(2)K02512/+ ;<br/>Trl</sup> <sup>81/+</sup> | -                            | 4,3E-01                              | 5,8E-03                    |

**Table S1D : p-values (p)**

|                                                                                    | Canton-S | <i>psq</i> <sup>0115/+</sup> | <i>Trl</i> <sup>81.1/+</sup> | <i>batman</i> <sup>(2)K02512/+</sup> | <i>psq</i> <sup>0115/+ ;<br/>Trl</sup> <sup>81.1/+</sup> | <i>batman</i> <sup>(2)K02512/+ ;<br/>Trl</sup> <sup>81.1/+</sup> |
|------------------------------------------------------------------------------------|----------|------------------------------|------------------------------|--------------------------------------|----------------------------------------------------------|------------------------------------------------------------------|
| <i>psq</i> <sup>0115/+</sup>                                                       | 1.3E-02  | -                            | -                            | -                                    | -                                                        | -                                                                |
| <i>Trl</i> <sup>81.1/+</sup>                                                       | 5.0E-07  | -                            | -                            | -                                    | -                                                        | -                                                                |
| <i>batman</i> <sup>(2)K02512/+</sup>                                               | 3.1E-03  | -                            | -                            | -                                    | -                                                        | -                                                                |
| <i>psq</i> <sup>0115/+ ;<br/>Trl</sup> <sup>81.1/+</sup>                           | 1.3E-10  | 8.5E-04                      | 2.1E-05                      | -                                    | -                                                        | -                                                                |
| <i>batman</i> <sup>(2)K02512/+ ;<br/>Trl</sup> <sup>81.1/+</sup>                   | 3.9E-04  | -                            | 2.8E-01                      | 2.1E-01                              | -                                                        | -                                                                |
| <i>batman</i> <sup>(2)K02512/psq</sup> <sup>0115 ;<br/>Trl</sup> <sup>81.1/+</sup> | 4.7E-11  | -                            | -                            | -                                    | 3.1E-01                                                  | 8.0E-04                                                          |

**Table S1D' : ΔON (%)**

|                                                                                    | Canton-S |
|------------------------------------------------------------------------------------|----------|
| <i>psq</i> <sup>0115/+</sup>                                                       | 11.1     |
| <i>Trl</i> <sup>81.1/+</sup>                                                       | 19.0     |
| <i>batman</i> <sup>(2)K02512/+</sup>                                               | 10.6     |
| <i>psq</i> <sup>0115/+ ;<br/>Trl</sup> <sup>81.1/+</sup>                           | 31.7     |
| <i>batman</i> <sup>(2)K02512/+ ;<br/>Trl</sup> <sup>81.1/+</sup>                   | 14.8     |
| <i>batman</i> <sup>(2)K02512/psq</sup> <sup>0115 ;<br/>Trl</sup> <sup>81.1/+</sup> | 28       |
