# Supplementary material for: Genetic Basis for Developmental Homeostasis of Germline Stem Cell Niche Number: A Network of Tramtrack-Group Nuclear BTB Factors
Source: PubMed Central journal article supplement (PMC3503823; doi:10.1371/journal.pone.0049958), 2012-11-21
Supplement: pone.0049958.s004.pdf [file pone.0049958.s004.pdf]

**Table S2. Statistical significance of comparisons between the mean number of ovarioles in *bab>psqIR* flies and in control flies.**

Data from Figure 2.

S2A: p-value (p) was calculated using Student's t-test to compare mean values of *bab>psqIR* samples and controls. (red/green code as in Table S1)

S2B:  $\Delta$ ON (in %) was calculated for *bab>psqIR* relative to Canton-S, the *bab*-Gal4 driver alone (*bab>*), and the UAS-*psqIR* RNAi line alone (*>psqIR*).

**Table S2A : p-values (p)**

|                     | Canton-S | <i>bab&gt;</i> | <i>&gt;psqIR</i> |
|---------------------|----------|----------------|------------------|
| <i>bab&gt;psqIR</i> | 7.4E-03  | 1.6E-03        | 4.0E-03          |

**Table S2B :  $\Delta$ ON (%)**

|                     | Canton-S | <i>bab&gt;</i> | <i>&gt;psqIR</i> |
|---------------------|----------|----------------|------------------|
| <i>bab&gt;psqIR</i> | 8.3      | 11.0           | 9.4              |
