# Supplementary material for: Genetic Basis for Developmental Homeostasis of Germline Stem Cell Niche Number: A Network of Tramtrack-Group Nuclear BTB Factors
Source: PubMed Central journal article supplement (PMC3503823; doi:10.1371/journal.pone.0049958), 2012-11-21
Supplement: pone.0049958.s005.pdf [file pone.0049958.s005.pdf]

**Table S3 Statistical significance of comparisons between the mean number of ovarioles in combinations of *bab* and other ttk-BTB group mutations.**

Data from Figure 3.

S3A-B: p-value (p) was calculated using Student's t-test between samples of appropriate genotypes.

S3A'-B':  $\Delta$ ON (in %) was calculated relative to Canton-S.

**Table S3A : p-values (p)**

|          | <i>bab<sup>P</sup>/+</i> | <i>bab<sup>pr72</sup>/+</i> | <i>bab<sup>E1</sup>/+</i> | <i>bab<sup>AR07</sup>/+</i> |
|----------|--------------------------|-----------------------------|---------------------------|-----------------------------|
| Canton-S | 2.6E-06                  | 3.0E-04                     | 3.6E-09                   | 4.4E-03                     |

**Table S3A' :  $\Delta$ ON (%)**

|                             | Canton-S |
|-----------------------------|----------|
| <i>bab<sup>P</sup>/+</i>    | 16.1     |
| <i>bab<sup>pr72</sup>/+</i> | 12.5     |
| <i>bab<sup>E1</sup>/+</i>   | 18.8     |
| <i>bab<sup>AR07</sup>/+</i> | 7.8      |

**Table S3B : p-values (p)**

|                                                      | Canton-S | <i>bab<sup>P</sup>/+</i> | <i>ban<sup>l(2)k02512</sup>/+</i> | <i>Trl<sup>81.1</sup>/+</i> | <i>psq<sup>0115</sup>/+</i> |
|------------------------------------------------------|----------|--------------------------|-----------------------------------|-----------------------------|-----------------------------|
| Canton-S                                             | -        | 3.8E-06                  | 3.1E-03                           | 5.0E-07                     | 4.7E-02                     |
| <i>ban<sup>l(2)k02512</sup>/+; bab<sup>P</sup>/+</i> | 6.5E-04  | 1.8E-01                  | 3.0E-01                           | -                           | -                           |
| <i>Trl<sup>81.1</sup>/bab<sup>P</sup></i>            | 3.7E-11  | 8.1E-04                  | -                                 | 1.9E-04                     | -                           |
| <i>psq<sup>0115</sup>/+; bab<sup>P</sup>/+</i>       | 1.0E-15  | 1.0E-07                  | -                                 | -                           | 4.3E-09                     |

**Table S3B' :  $\Delta$ ON (%)**

|                                                      | Canton-S |
|------------------------------------------------------|----------|
| <i>bab<sup>P</sup>/+</i>                             | 19.8     |
| <i>ban<sup>l(2)k02512</sup>/+</i>                    | 10.6     |
| <i>Trl<sup>81.1</sup>/+</i>                          | 19.0     |
| <i>psq<sup>0115</sup>/+</i>                          | 9.5      |
| <i>ban<sup>l(2)k02512</sup>/+; bab<sup>P</sup>/+</i> | 14.3     |
| <i>Trl<sup>81.1</sup>/bab<sup>P</sup></i>            | 34.4     |
| <i>psq<sup>0115</sup>/+; bab<sup>P</sup>/+</i>       | 43.9     |
