# Supplementary material for: Genetic Basis for Developmental Homeostasis of Germline Stem Cell Niche Number: A Network of Tramtrack-Group Nuclear BTB Factors
Source: PubMed Central journal article supplement (PMC3503823; doi:10.1371/journal.pone.0049958), 2012-11-21
Supplement: pone.0049958.s006.pdf [file pone.0049958.s006.pdf]

**Table S4. Statistical significance for comparisons of cellular parameters between pupal or adult ovaries between heterozygous combinations of *bab* and *psq* mutations**

Data from Figure 4.

p-value (p) was calculated using Student's t-test between samples of appropriate genotypes. Color code as in Table S1.

**Table S4A Pupa : p-values (p) for TFC number per TF**

|                                                 | <i>bab<sup>P</sup>/+</i> | <i>psq<sup>0115</sup>/+</i> | <i>psq<sup>0115</sup>/+ ; bab<sup>P</sup>/+</i> |
|-------------------------------------------------|--------------------------|-----------------------------|-------------------------------------------------|
| Canton-S                                        | 1.0E-07                  | 3.4E-01                     | 1.7E-13                                         |
| <i>psq<sup>0115</sup>/+ ; bab<sup>P</sup>/+</i> | 8.1E-02                  | 1.7E-12                     | -                                               |

**Table S4B Pupa : p-values (p) for TFC volume**

|          | <i>bab<sup>P</sup>/+</i> | <i>psq<sup>0115</sup>/+</i> |
|----------|--------------------------|-----------------------------|
| Canton-S | 6.4E-03                  | 4.4E-01                     |

**Table S4C Pupa : p-values (p) for TFC number per ovary**

|                                                 | <i>bab<sup>P</sup>/+</i> | <i>psq<sup>0115</sup>/+</i> | <i>psq<sup>0115</sup>/+ ; bab<sup>P</sup>/+</i> |
|-------------------------------------------------|--------------------------|-----------------------------|-------------------------------------------------|
| Canton-S                                        | 7.2E-01                  | 1.9E-02                     | 1.7E-04                                         |
| <i>psq<sup>0115</sup>/+ ; bab<sup>P</sup>/+</i> | 1.8E-03                  | 2.5E-02                     | -                                               |

**Table S4D Adult : p-values (p) for TFC number per TF**

|                                                 | <i>bab<sup>P</sup>/+</i> | <i>psq<sup>0115</sup>/+</i> | <i>psq<sup>0115</sup>/+ ; bab<sup>P</sup>/+</i> |
|-------------------------------------------------|--------------------------|-----------------------------|-------------------------------------------------|
| Canton-S                                        | 8.6E-10                  | 7.8E-01                     | 2.2E-21                                         |
| <i>psq<sup>0115</sup>/+ ; bab<sup>P</sup>/+</i> | 5.5E-06                  | 1.1E-26                     | -                                               |

**Table S4E Adult : p-values (p) for CC number per TF**

|          | <i>bab<sup>P</sup>/+</i> | <i>psq<sup>0115</sup>/+</i> |
|----------|--------------------------|-----------------------------|
| Canton-S | 2.7E-01                  | 5.4E-01                     |
