# Supplementary material for: Genetic Basis for Developmental Homeostasis of Germline Stem Cell Niche Number: A Network of Tramtrack-Group Nuclear BTB Factors
Source: PubMed Central journal article supplement (PMC3503823; doi:10.1371/journal.pone.0049958), 2012-11-21
Supplement: pone.0049958.s007.pdf [file pone.0049958.s007.pdf]

**Table S5A. TF number per ovary at the pupal stage**

|                    | Canton-S | <i>bab<sup>P</sup>/+</i> | <i>psq<sup>0115</sup>/+</i> | <i>psq<sup>0115</sup>/+ ; bab<sup>P</sup>/+</i> |
|--------------------|----------|--------------------------|-----------------------------|-------------------------------------------------|
| Mean               | 21.22    | 24.60                    | 24.57                       | 31.83                                           |
| Standard Deviation | 0.74     | 1.17                     | 0.95                        | 0.13                                            |

**Table S5B. Difference in the mean TF number between wild type, simple and double heterozygotes at the pupal stage**

|                             | <i>bab<sup>P</sup>/+</i> | <i>psq<sup>0115</sup>/+</i> | <i>psq<sup>0115</sup>/+ ; bab<sup>P</sup>/+</i> |
|-----------------------------|--------------------------|-----------------------------|-------------------------------------------------|
| Canton-S                    | 3.38                     | 3.35                        | 10.61                                           |
| <i>bab<sup>P</sup>/+</i>    | -                        | 0.03                        | 7.23                                            |
| <i>psq<sup>0115</sup>/+</i> | -                        | -                           | 7.26                                            |
